# Supplementary material for: Possible role for rare TRPM7 variants in patients with hypomagnesaemia with secondary hypocalcaemia
Source: PubMed Central journal article supplement — Nephrol Dial Transplant. 2022 May 13;38(3):679–90. doi: 10.1093/ndt/gfac182 (PMC9976740; doi:10.1093/ndt/gfac182), 2022-05-13
Supplement: gfac182_supplemental_file.pdf [file gfac182_supplemental_file.pdf]

## SUPPLEMENTAL MATERIAL

### ***TRPM7* mutations cause autosomal dominant hypomagnesemia with secondary hypocalcemia type 2 (HSH2)**

*Rosa Vargas-Poussou*<sup>1\*</sup>, *Felix Claverie-Martin*<sup>2\*</sup>, *Caroline Prot-Bertoye*<sup>3,4,5\*</sup>, *Jenny van der Wijst*<sup>6</sup>, *Valentina Carotti*<sup>6</sup>, *Ana Perdomo-Ramirez*<sup>2</sup>, *Gloria M. Fraga-Rodriguez*<sup>7</sup>, *Caro Bos*<sup>6</sup>, *Femke Latta*<sup>6</sup>, *Pascal Houillier*<sup>3,4,5</sup>, *Joost Hoenderop*<sup>6</sup>, *Jeroen de Baaij*<sup>6</sup>

#### TABLE OF CONTENTS

##### Full Methods

**Supplementary Table 1.** Variants found in hypomagnesemia genes of individual F1-II.1

**Supplementary Table 2.** Rare genetic variants of individual F1-II.2

**Supplementary Table 3.** Variants found in hypomagnesemia genes of individual F2-II.1

**Supplementary Table 4.** Rare genetic variants of individual F2-II.1

**Supplementary Table 5.** Primers used for PCR and sequencing

**Supplementary Figure 1.** Overview of the defective spliced transcript of TRPM7

## **Full Methods**

### *Patient examinations*

Electrolyte measurements in blood and 24 hours urine of the patients were performed according to standard procedures. Mg<sup>2+</sup> loading tests were performed in family 1. During the test, fasting patients and controls were seated and were allowed to stand to void. They were maintained on their usual diet with a normal NaCl intake the days before the test. Urine was collected at 30-minute intervals, and venous blood was drawn through an indwelling catheter at the midpoint of each period. After two 30-minute control periods, four additional 30-minute urine collections were obtained during continuous MgCl<sub>2</sub> infusion (10 mmol in 5% (w/v) dextrose over two hours) for measurement of urinary creatinine and Mg, and serum creatinine and Mg concentrations.

Informed consent was obtained in accordance with Institutional Review Board guidelines. Informed written consent for the genetic analysis of Family 2 was obtained from the patients' parents. The Ethics Committee of Nuestra Señora de Candelaria University Hospital (Santa Cruz de Tenerife, Spain) approved this study

### *Whole exome sequencing*

Genomic DNA of subjects was isolated from whole blood according to standard protocols. WES for proband of Family 1 was performed at BGI-Europe (Copenhagen, Denmark), employing an Illumina HiSeq2000TM machine (Illumina, San Diego, CA, USA). For these samples, 'read alignment' using BWA and 'variant calling' with GATK were performed at BGI. For all patients, variants were annotated with an in-house developed annotation and prioritization pipeline.<sup>22</sup> Variants in genes associated with hypomagnesemia were selected and analyzed, but no known hypomagnesemia-causing mutations were found.

Supplementary table 1 provides an overview of the rare variants detected by whole exome sequencing in individual F1-II.2 after excluding variants in introns and UTRs, synonymous variants, variants in dbSNP with frequency >1%, variants in our inhouse database with frequency >1% and variants in poorly conserved regions (phyloP <2).

WES analysis for patient and parents of Family 2 was performed by Macrogen Inc. (Seoul, South Korea) using an Illumina NovaSeq 6000 platform (Seoul, South Korea) with a read length of 100bp PE. A standard analysis of the raw data was performed by Macrogen for each individual. We analyzed variants in genes encoding Mg<sup>2+</sup> transporters and genes associated with hypomagnesemia. No other mutation suspected of causing hypomagnesemia was found. A summary of rare variants detected in patient F2-II.1 by WES analysis is shown in Supplementary Table 2. The following variants were excluded: variants in introns and UTRs, synonymous variants, variants in databases with frequency >1%, variants with quality <100 and variants with a low probability to be damaging, according to Polyphen score (<0,80).

#### *PCR and Sanger sequencing*

Genomic DNA of subjects was isolated from whole blood according to standard protocols. For Sanger sequencing, primers were designed on TRPM7 (Fw: GGTGTCGCCTCTAACTTGCT, Rv: TGAAAGACTCGGCTTCTGCT), and used for polymerase chain reaction (PCR). mRNA isolation of HEK293 cells was performed using TRIzol reagent (Invitrogen) according to manufacturer's protocol. mRNA isolation of blood was performed using the PAXgene Blood RNA kit (Qiagen), according to the manufacturer's protocol. Isolated mRNA was treated with DNase (Promega) and subsequently cDNA was synthesized using Moloney-Murine Leukemia Virus (M-MLV) reverse transcriptase (Invitrogen). TRPM7 splicing was determined using PCR primers designed on exons 1 and 2 and intron 1 (Figure 2A and Supplementary Table 3). Amplified sequences from both genomic DNA and cDNA were separated on agarose gel by electrophoresis and directly Sanger sequenced according to standard methods. NM\_017672.6 was used as a reference sequence.

To identify the sequences of the alternatively spliced TRPM7, a 5' RACE PCR was performed according to the manufacturer's protocol (Invitrogen). In short, a gene-specific antisense oligonucleotide (GSP1) primer is used for first strand cDNA synthesis. Subsequently the first strand product is purified from unincorporated dNTPs and GSP1, and a homopolymeric tail is added to the 3' end of the cDNA by terminal deoxynucleotidyl transferase (TdT). The tailed

cDNA is then amplified by PCR using a mixture of three primers: a nested gene-specific primer (GSP2), which anneals 3' to GSP1; and a combination of a complementary homopolymer-containing anchor primer and corresponding adapter primer, to amplify the homopolymeric tail. The amplified sequences were cloned in the pGEM-T Easy Vector (Promega) according to the manufacturer's protocol and subsequently Sanger sequenced.

### *Cell culture*

Primary fibroblast cultures were established from a skin biopsy as described previously.<sup>23</sup> Subsequently, fibroblasts were cultured in Medium 199 containing EBSS, L-glutamine and 2.2 g/L NaHCO<sub>3</sub> (Lonza, Walkersville, MD, USA) at 37°C in a humidity-controlled incubator with 5% (v/v) CO<sub>2</sub>. HEK293 cells were grown in Dulbecco's modified eagle's medium (DMEM, Bio Whittaker-Europe, Verviers, Belgium) containing 10% (v/v) fetal bovine serum (Biowest, Nuaille, France), 2 mmol/L L-glutamine and 10 µg/mL non-essential amino acids, at 37°C in a humidity-controlled incubator with 5% (v/v) CO<sub>2</sub>. The cells were transiently transfected with the respective DNA constructs using Lipofectamin 2000 (Invitrogen, Breda, The Netherlands) at 1:2 DNA:Lipofectamin ratio for 48 hours unless otherwise stated.

Cells were fixed at different time points with 0.5% crystal violet (santa cruz sc-207460) (in 20% methanol (VWR 20903.368), 80% distilled water) for 15 minutes at room temperature, after which they were washed with distilled water. After overnight drying, methanol (100%) was added and absorbance was measured at 570nm with a spectrophotometer.

### *Constructs*

The pTracer-mTRPM7 construct with amino-terminal HA tag was a kind gift from Dr. David E. Clapham. The p.Gly1046Asp mutation was introduced using the Q5 site-directed mutagenesis kit (NEB, Leiden, Netherlands) using primer F: 5'-ATGATTTTTGATGAAGTTTATGCATATG-3' and R: 5'-CCAGTATGGATGAAAACTATATC-3'.

### *Electrophysiology*

HEK293 cells were transiently transfected with HA-mTRPM7 wildtype and HA-mTRPM7 p.Gly1046Asp pTracer plasmids, either alone or as co-transfection in a 1:1 ratio. Additionally, cells were transiently co-transfected with HA-hTRPM6 pCINeo IRES GFP in combination with either HA-mTRPM7 wildtype or HA-mTRPM7 p.Gly1046Asp pTracer plasmids (1:1 ratio), empty pcDNA3 as mock control. Transfected cells were identified by green fluorescence, and non-transfected (green fluorescent-negative) cells from the same batch were used as controls. Electrophysiological recordings were undertaken in whole-cell configuration using an EPC-10 USB patch-clamp amplifier controlled by the Patchmaster software (HEKA, Lambrecht, Germany). Cells were kept in an extracellular bath solution (150 mM NaCl, 1 mM CaCl<sub>2</sub>, 10 mM Hepes/NaOH, pH 7.4). Pipettes were pulled from thin-walled borosilicate glass (Harvard Apparatus, March-Hugstetten, Germany) and had resistance between 1 and 3 MΩ when filled with the pipette solution (150 mM NaCl, 10 mM Na<sub>2</sub>-EDTA, 10 mM Hepes/NaOH, pH 7.2). The capacitance and access resistance were monitored continuously. A linear voltage ramp from -100 to +100 mV (in 450 ms) was applied every 2 seconds from a holding potential of 0 mV. The time course of current development was determined by extracting the current amplitudes at +80 and -80 mV. Current densities were obtained by normalizing current amplitudes to the respective cell membrane capacitances, with a bar graph showing the channel activity at 200 seconds after opening the cell membrane. All experiments were performed at room temperature. Analysis and display of patch clamp data was performed using Igor Pro software (WaveMetrics, Lake Oswego, USA) and Graphpad Prism (San Diego, California, USA), using one-way ANOVA with Sidak's posthoc test for statistical testing.

#### *<sup>25</sup>Mg<sup>2+</sup> uptake experiments*

HEK293 cells were seeded in poly-L-lysine coated 12-well plates and transfected with mock or TRPM7 constructs. After 48 hours, cells were 30 minutes pre-incubated with 30 μmol/L NS8593 or 0.4 % (v/v) DMSO. Transfected HEK293 cells were washed in basic uptake buffer (in mmol/L: 125 NaCl, 5 KCl, 0.5 CaCl<sub>2</sub>, 0.5 Na<sub>2</sub>HPO<sub>4</sub>, 0.5 Na<sub>2</sub>SO<sub>4</sub>, 15 HEPES/NaOH pH 7.5) and subsequently placed in basic uptake buffer with 1 mmol/L <sup>25</sup>Mg<sup>2+</sup> for 0 or 15 minutes

with or without 30  $\mu\text{mol/L}$  NS8593 or 0.4 % DMSO. The buffer was removed, cells were washed 3 times with PBS, lysed in  $\text{HNO}_3$  and subjected to inductively coupled plasma mass spectrometry (ICP-MS) analysis as described previously.<sup>24</sup> Naturally occurring  $^{25}\text{Mg}^{2+}$  content of the cells was determined at time point 0 and was subtracted from the other time points when calculating net fluxes.

#### *Immunoblotting*

Protein lysates were denatured in Laemmli sample buffer (250 mM Tris-HCl pH 6.8, 10% (w/v) SDS, 30% (v/v) glycerol and 0.02% (w/v) bromophenol blue). Samples were subjected to 8% (w/v) SDS/PAGE, transferred to polyvinylidene fluoride membranes that were blocked for 30 min with 5% (w/v) nonfat dry milk in Tris-buffered saline, 0.1% (v/v) Tween 20 (TBS-T) and immunoblotted overnight at 4 °C using anti-HA (Roche, high affinity 3F10, 1:5,000). The blots were then washed with TBS-T and incubated with secondary peroxidase-labeled goat anti-mouse IgG (1:10,000; Jackson ImmunoResearch) for 1 h at room temperature. After subsequent washes, they were visualized with an enhanced chemiluminescence reagent using the Bio-Rad ChemiDoc XRS imaging system.

#### *Cell surface biotinylation*

HEK293 cells were transfected with wild type and mutant TRPM7 constructs. Cell surface proteins were biotinylated as described previously.<sup>24</sup> Protein lysates were subjected to SDS-PAGE and immunoblots were incubated using mouse anti-HA (1:5,000; Cell Signaling, Danvers, MA, USA).

#### *Statistics*

All results are depicted as mean  $\pm$  standard deviation (S.D.) or standard error of the mean (S.E.M.). Statistical analyses were conducted by one-way or two-way ANOVA, or a T-test, depending on the experimental set-up. Tukey's post-test was used to identify significantly different groups.  $P < 0.05$  was considered statistically significant.



**Supplementary Table 1.** Variants found in hypomagnesemia genes of individual F1-II.2

| Chr   | Position  | Ref. | Var. | Gene Name | Effect      | AA Ref. | AA Mut. | SNP ID    | Freq. | ClinVar Interpretation |
|-------|-----------|------|------|-----------|-------------|---------|---------|-----------|-------|------------------------|
| chr1  | 16371067  | G    | T    | CLCNKB    | EXON_REGION | R       | L       | rs2015352 | 0,55  | Benign                 |
| chr1  | 16375354  | C    | T    | CLCNKB    | UTR         | -       | -       | rs9442227 | 0,68  | Not reported           |
| chr1  | 16376191  | C    | T    | CLCNKB    | EXON_REGION | A       | V       | rs7367494 | 0,92  | Benign                 |
| chr1  | 16380196  | T    | C    | CLCNKB    | EXON_REGION | M       | T       | rs5253    | 0,88  | Benign                 |
| chr1  | 16380243  | A    | G    | CLCNKB    | EXON_REGION | K       | E       | rs2275166 | 0,72  | Benign                 |
| chr1  | 43200526  | T    | C    | CLDN19    | UTR         | -       | -       | rs912075  | 0,59  | Benign                 |
| chr1  | 55464743  | T    | C    | BSND      | UTR         | -       | -       | rs2500340 | 0,66  | Benign                 |
| chr1  | 55464790  | C    | G    | BSND      | UTR         | -       | -       | rs2500341 | 0,66  | Benign                 |
| chr1  | 55474325  | A    | C    | BSND      | UTR         | -       | -       | rs6682884 | 0,43  | Benign                 |
| chr3  | 122003832 | G    | C    | CASR      | EXON_REGION | E       | Q       | rs1801726 | 0,92  | Benign                 |
| chr3  | 122004098 | A    | T    | CASR      | UTR         | -       | -       | rs4677948 | 0,92  | Benign                 |
| chr4  | 110914427 | A    | T    | EGF       | EXON_REGION | E       | V       | rs4698803 | 0,86  | Benign                 |
| chr7  | 55229255  | G    | A    | EGFR      | EXON_REGION | R       | K       | rs2227983 | 0,23  | Benign                 |
| chr10 | 72643671  | C    | T    | PCBD1     | UTR         | -       | -       | rs9712    | 0,75  | Benign                 |
| chr10 | 104836940 | C    | T    | CNNM2     | UTR         | -       | -       | rs2296568 | 0,12  | Benign                 |
| chr12 | 5022041   | G    | A    | KCNA1     | UTR         | -       | -       | rs4766310 | 0,48  | Benign                 |

Other variants associated with hypomagnesemia detected by whole exome sequencing in patient F1-II.2. Deep intronic variants, synonymous variants and variants with quality <100 were not included. Chr: chromosome, Ref: reference, Var: variant, AA: amino acid, Mut: mutation, Freq: frequency. The genes included in the analysis were: *CLDN16*, *CLDN19*, *CaSR*, *CLCNKB*, *SLC12A3*, *BSND*, *KCNJ10*, *FXYD2*, *HNF1B*, *PCBD1*, *SARS2*, *TRPM6*, *EGF*, *EGFR*, *CNNM2*, *KCNA1*, *FAM111A*, *SLC41A1*, *ATP1A1* and *MAGT1*.



**Supplementary Table 2.** Rare genetic variants of individual F1-II.2

| Chr.         | Position        | Ref.     | Var.     | Gene name    | Component                | AA Ref. | AA Mut. | Allele freq.          |
|--------------|-----------------|----------|----------|--------------|--------------------------|---------|---------|-----------------------|
| chr1         | 36075012        | G        | C        | PSMB2        | SA_SITE                  |         |         | NP                    |
| chr1         | 109814994       | A        | G        | CELSR2       | EXON_REGION              | K       | R       | 1.77x10 <sup>-5</sup> |
| chr1         | 150443574       | T        | A        | RPRD2        | EXON_REGION              | I       | N       | 4.85x10 <sup>-5</sup> |
| chr1         | 165175260       | C        | T        | LMX1A        | EXON_REGION              | G       | S       | 3.41x10 <sup>-5</sup> |
| chr1         | 182555526       | T        | C        | RNASEL       | EXON_REGION              | K       | R       | NP                    |
| chr1         | 204951032       | G        | A        | NFASC        | EXON_REGION              | R       | H       | 1.44x10 <sup>-5</sup> |
| chr1         | 228539078       | A        | G        | OBSCN        | EXON_REGION              | E       | G       | NP                    |
| chr1         | 235966304       | C        | G        | LYST         | EXON_REGION              | D       | H       | 6.38x10 <sup>-5</sup> |
| chr2         | 9000857         | G        | C        | MBOAT2       | EXON_REGION              | S       | C       | 4.20x10 <sup>-6</sup> |
| chr2         | 71895939        | C        | T        | DYSF         | EXON_REGION              | P       | L       | 8.00x10 <sup>-6</sup> |
| chr2         | 152421631       | T        | C        | NEB          | EXON_REGION              | K       | R       | 1.10x10 <sup>-4</sup> |
| chr2         | 190530947       | G        | A        | ASNSD1       | EXON_REGION              | R       | Q       | 2.48x10 <sup>-5</sup> |
| chr2         | 227898171       | C        | T        | COL4A4       | EXON_REGION              | G       | S       | 8.56x10 <sup>-5</sup> |
| chr3         | 50326736        | C        | T        | IFRD2        | EXON_REGION              | A       | T       | 1.06x10 <sup>-4</sup> |
| chr3         | 50327861        | T        | G        | IFRD2        | EXON_REGION              | E       | A       | NP                    |
| chr3         | 52559025        | G        | A        | NT5DC2       | EXON_REGION              | S       | L       | 1.30x10 <sup>-4</sup> |
| chr3         | 63981362        | G        | A        | ATXN7        | EXON_REGION              | G       | R       | 4.01x10 <sup>-6</sup> |
| chr3         | 100469375       | C        | A        | ABI3BP       | EXON_REGION              | W       | C       | NP                    |
| chr4         | 1807488         | G        | A        | FGFR3        | EXON_REGION              | V       | M       | 1.76x10 <sup>-4</sup> |
| chr4         | 184585057       | T        | C        | TRAPPC11     | EXON_REGION              | C       | R       | 1.19x10 <sup>-5</sup> |
| chr5         | 75871587        | G        | A        | IQGAP2       | EXON_REGION              | A       | T       | 4.23x10 <sup>-5</sup> |
| chr6         | 7889033         | C        | T        | TXNDC5       | EXON_REGION              | V       | M       | 1.13x10 <sup>-4</sup> |
| chr6         | 36693650        | C        | T        | RAB44        | EXON_REGION              | R       | W       | 2.01x10 <sup>-5</sup> |
| chr6         | 51909793        | T        | A        | PKHD1        | EXON_REGION              | M       | L       | 7.96x10 <sup>-6</sup> |
| chr6         | 64416000        | A        | G        | PHF3         | EXON_REGION              | N       | S       | 1.99x10 <sup>-5</sup> |
| chr6         | 117859876       | G        | A        | DCBLD1       | EXON_REGION              | W       | *       | 3.98x10 <sup>-6</sup> |
| chr7         | 151093051       | C        | A        | WDR86        | EXON_REGION              | Q       | H       | NP                    |
| chr8         | 24333949        | C        | T        | ADAM7        | EXON_REGION              | R       | C       | 1.71x10 <sup>-4</sup> |
| chr8         | 74334861        | C        | A        | STAU2        | EXON_REGION              | G       | V       | 4.49x10 <sup>-5</sup> |
| chr8         | 106811144       | G        | A        | ZFPM2        | EXON_REGION              | R       | Q       | 4.82x10 <sup>-5</sup> |
| chr9         | 73254127        | T        | A        | TRPM3        | SA_SITE                  |         |         | 3.20x10 <sup>-5</sup> |
| chr9         | 100234679       | C        | T        | TDRD7        | EXON_REGION              | L       | F       | 2.13x10 <sup>-5</sup> |
| chr9         | 136223836       | A        | G        | SURF2        | EXON_REGION              | E       | G       | NP                    |
| chr11        | 57466661        | TCC      |          | ZDHHC5       | EXON_REGION              | S       |         | NP                    |
| chr11        | 132306003       | G        | A        | OPCML        | EXON_REGION              | T       | I       | NP                    |
| chr12        | 72092874        | A        | G        | TMEM19       | EXON_REGION              | T       | A       | 5.30x10 <sup>-5</sup> |
| chr14        | 78221423        | C        | T        | SNW1         | EXON_REGION              | E       | K       | 3.54x10 <sup>-5</sup> |
| <b>chr15</b> | <b>50978727</b> | <b>C</b> | <b>G</b> | <b>TRPM7</b> | <b>SD_SITE_CANONICAL</b> |         |         | <b>NP</b>             |
| chr15        | 86076851        | G        | A        | AKAP13       | EXON_REGION              | C       | Y       | 3.90x10 <sup>-5</sup> |
| chr16        | 57741550        | A        | T        | CCDC135      | EXON_REGION              | N       | I       | 3.99x10 <sup>-6</sup> |

|       |          |   |   |         |             |   |   |                       |
|-------|----------|---|---|---------|-------------|---|---|-----------------------|
| chr17 | 3854559  | A | G | ATP2A3  | EXON_REGION | I | T | 1.25x10 <sup>-4</sup> |
| chr17 | 30648174 | T | C | RHBDL3  | EXON_REGION | F | L | NP                    |
| chr17 | 41223246 | G | A | BRCA1   | EXON_REGION | P | L | NP                    |
| chr18 | 8253288  | G | A | PTPRM   | EXON_REGION | R | Q | 7.31x10 <sup>-5</sup> |
| chr18 | 52937094 | G | A | TCF4    | EXON_REGION | T | M | 3.99x10 <sup>-6</sup> |
| chr19 | 8434121  | A | G | ANGPTL4 | EXON_REGION | Q | R | 4.04x10 <sup>-6</sup> |
| chr19 | 10670133 | C | T | KRI1    | EXON_REGION | E | K | 6.36x10 <sup>-5</sup> |
| chr19 | 31768897 | G | A | TSHZ3   | EXON_REGION | P | L | 1.59x10 <sup>-5</sup> |
| chr19 | 36149535 | C | T | COX6B1  | EXON_REGION | P | S | 1.13x10 <sup>-4</sup> |
| chr19 | 39860678 | C | T | SAMD4B  | EXON_REGION | P | S | NP                    |
| chr19 | 40698183 | C | T | MAP3K10 | EXON_REGION | A | V | NP                    |
| chr19 | 47258718 | C | G | FKRP    | EXON_REGION | T | S | 1.08x10 <sup>-4</sup> |
| chr20 | 42972148 | A | G | R3HDML  | EXON_REGION | Q | R | 4.19x10 <sup>-6</sup> |

Overview of the rare variants detected by whole exome sequencing in individual F1-II.2 after

excluding variants in introns and UTRs, synonymous variants, variants in dbSNP with frequency >1%, variants in our in-house database with frequency >1% and variants in poorly conserved regions (phyloP <2). TRPM7 mutation indicated in bold. Chr: chromosome, Ref: reference, Var: variant, AA: amino acid, Mut: mutation, Freq: population frequency with respect to gnomAD (Karczewski et al 2020). NP: Not present.

**Supplementary Table 3.** Variants found in hypomagnesemia genes of individual F2-II.1

| Chr   | Position  | Ref. | Var. | Gene Name      | Effect          | AA Ref. | AA Mut. | SNP ID      | Freq.                 | ClinVar Interpretation |
|-------|-----------|------|------|----------------|-----------------|---------|---------|-------------|-----------------------|------------------------|
| chr1  | 16366234  | T    | G    | <i>CLCNKB</i>  | upstream_gene   | -       | -       | rs1815526   | 0,90                  | Not reported           |
| chr1  | 16374994  | C    | T    | <i>CLCNKB</i>  | splice_region   | -       | -       | rs1889788   | 0,74                  | Benign                 |
| chr1  | 16375063  | C    | G    | <i>CLCNKB</i>  | missense        | A       | G       | rs1889789   | 0,83                  | Benign                 |
| chr1  | 16375354  | C    | T    | <i>CLCNKB</i>  | 5_prime_UTR     | -       | -       | rs9442227   | 0,73                  | Not reported           |
| chr1  | 16376191  | C    | T    | <i>CLCNKB</i>  | missense        | A       | V       | rs7367494   | 0,83                  | Benign                 |
| chr1  | 16378000  | A    | G    | <i>CLCNKB</i>  | missense        | I       | V       | rs6650119   | 0,10                  | Benign                 |
| chr1  | 16378725  | A    | T    | <i>CLCNKB</i>  | missense        | T       | S       | rs12140311  | 0,10                  | Benign                 |
| chr1  | 16380196  | T    | C    | <i>CLCNKB</i>  | missense        | M       | T       | rs5253      | 0,84                  | Benign                 |
| chr1  | 16380243  | A    | G    | <i>CLCNKB</i>  | missense        | K       | E       | rs2275166   | 0,70                  | Benign                 |
| chr1  | 16383448  | A    | C    | <i>CLCNKB</i>  | 3_prime_UTR     | -       | -       | rs10803415  | 0,90                  | Not reported           |
| chr1  | 16383581  | G    | T    | <i>CLCNKB</i>  | 3_prime_UTR     | -       | -       | rs1057844   | 0,53                  | Not reported           |
| chr1  | 16383605  | A    | G    | <i>CLCNKB</i>  | 3_prime_UTR     | -       | -       | rs1057845   | 0,59                  | Not reported           |
| chr1  | 16383668  | T    | G    | <i>CLCNKB</i>  | 3_prime_UTR     | -       | -       | rs6660218   | 1,00                  | Not reported           |
| chr1  | 16383742  | C    | G    | <i>CLCNKB</i>  | 3_prime_UTR     | -       | -       | rs1057857   | 0,65                  | Not reported           |
| chr1  | 16383914  | C    | T    | <i>CLCNKB</i>  | downstream_gene | -       | -       | rs10927896  | 0,31                  | Not reported           |
| chr1  | 43201534  | G    | A    | <i>CLDN19</i>  | missense        | R       | C       | rs4660658   | 0,19                  | Benign                 |
| chr1  | 55464743  | T    | C    | <i>BSND</i>    | 5_prime_UTR     | -       | -       | rs2500340   | 0,59                  | Benign                 |
| chr1  | 55464790  | C    | G    | <i>BSND</i>    | 5_prime_UTR     | -       | -       | rs2500341   | 0,60                  | Benign                 |
| chr3  | 122003832 | G    | C    | <i>CASR</i>    | missense        | E       | Q       | rs1801726   | 0,92                  | Benign                 |
| chr3  | 122004098 | A    | T    | <i>CASR</i>    | 3_prime_UTR     | -       | -       | rs4677948   | 0,92                  | Benign                 |
| chr3  | 190106071 | AG   | A    | <i>CLDN16</i>  | frameshift      | -       | -       | rs368234054 | 0,12                  | Benign                 |
| chr3  | 190106074 | G    | C    | <i>CLDN16</i>  | missense        | A       | P       | rs3214506   | 0,12                  | Benign                 |
| chr4  | 110901198 | G    | A    | <i>EGF</i>     | missense        | M       | I       | rs2237051   | 0,62                  | Benign                 |
| chr4  | 110914427 | A    | T    | <i>EGF</i>     | missense        | E       | V       | rs4698803   | 0,92                  | Benign                 |
| chr7  | 55086780  | A    | C    | <i>EGFR</i>    | 5_prime_UTR     | -       | -       | rs712830    | 0,93                  | Likely-Benign          |
| chr9  | 77376647  | T    | C    | <i>TRPM6</i>   | missense        | K       | E       | rs2274924   | 0,29                  | Benign                 |
| chr9  | 77502160  | G    | A    | <i>TRPM6</i>   | missense        | T       | I       | rs1333342   | 0,40                  | Not reported           |
| chr12 | 5022041   | G    | A    | <i>KCNA1</i>   | 3_prime_UTR     | -       | -       | rs4766310   | 0,48                  | Benign                 |
| chr16 | 56904587  | C    | G    | <i>SLC12A3</i> | missense        | A       | G       | rs1529927   | 0,99                  | Benign                 |
| chr16 | 56906338  | G    | A    | <i>SLC12A3</i> | missense        | E       | K       | rs146834675 | 3,99x10 <sup>-4</sup> | Likely-Benign          |
| chr16 | 56917953  | T    | C    | <i>SLC12A3</i> | splice_region   | -       | -       | rs2304483   | 0,57                  | Benign                 |
| chr16 | 56947522  | A    | G    | <i>SLC12A3</i> | 3_prime_UTR     | -       | -       | rs5805      | 0,59                  | Benign                 |
| chr17 | 36047275  | C    | T    | <i>HNF1B</i>   | 3_prime_UTR     | -       | -       | rs1800929   | 0,78                  | Benign                 |
| chr19 | 39408360  | A    | G    | <i>SARS2</i>   | splice_region   | -       | -       | rs7508411   | 0,83                  | Benign                 |
| chr19 | 39421388  | A    | G    | <i>SARS2</i>   | 5_prime_UTR     | -       | -       | rs730078    | 0,84                  | Benign                 |

Other variants associated with hypomagnesemia detected by whole exome sequencing in patient F2-II.1. Deep intronic variants, synonymous variants and variants with quality <100 were not included. Chr: chromosome, Ref: reference, Var: variant, AA: amino acid, Mut: mutation, Freq: frequency. The genes included in the analysis were: *CLDN16*, *CLDN19*, *CaSR*, *CLCNKB*, *SLC12A3*, *BSND*, *KCNJ10*, *FXD2*, *HNF1B*, *PCBD1*, *SARS2*, *TRPM6*, *EGF*, *EGFR*, *CNNM2*, *KCNA1*, *FAM111A*, *SLC41A1*, *ATP1A1* and *MAGT1*.

**Supplementary Table 4.** Rare genetic variants of individual F2-II.1

| Chr.         | Position        | Ref.     | Var.     | Gene Name    | Effect                    | AA Ref.  | AA Mut.  | Freq.                 |
|--------------|-----------------|----------|----------|--------------|---------------------------|----------|----------|-----------------------|
| chr1         | 10703237        | C        | T        | CASZ1        | missense_variant          | D        | N        | 1,07x10 <sup>-5</sup> |
| chr1         | 204378823       | C        | G        | PPP1R15B     | missense_variant          | A        | P        | 8,49x10 <sup>-5</sup> |
| chr2         | 20205777        | G        | C        | MATN3        | missense_variant          | A        | G        | NP                    |
| chr2         | 61258814        | T        | A        | PEX13        | missense_variant          | F        | Y        | 3,18x10 <sup>-5</sup> |
| chr2         | 74687357        | G        | A        | WBP1         | missense_variant          | S        | N        | NP                    |
| chr2         | 110325533       | A        | C        | SEPT10       | missense_variant          | I        | M        | 8,14x10 <sup>-6</sup> |
| chr2         | 185803250       | A        | G        | ZNF804A      | missense_variant          | K        | E        | 1,59x10 <sup>-5</sup> |
| chr2         | 209195297       | A        | G        | PIKFYVE      | missense_variant          | H        | R        | NP                    |
| chr3         | 43389333        | C        | T        | SNRK         | missense_variant          | R        | W        | 1,2x10 <sup>-5</sup>  |
| chr5         | 75964596        | A        | T        | IQGAP2       | missense_variant          | N        | Y        | NP                    |
| chr5         | 115824656       | C        | T        | SEMA6A       | missense_variant          | A        | T        | 1,51x10 <sup>-4</sup> |
| chr5         | 162868260       | G        | C        | CCNG1        | missense_variant          | W        | C        | 4,59x10 <sup>-5</sup> |
| chr5         | 177649545       | A        | C        | PHYKPL       | missense_variant          | D        | E        | NP                    |
| chr6         | 26056107        | T        | C        | HIST1H1C     | missense_variant          | K        | E        | 1,19x10 <sup>-5</sup> |
| chr6         | 26409806        | G        | A        | BTN3A1       | missense_variant          | G        | E        | 3,98x10 <sup>-6</sup> |
| chr6         | 132966494       | C        | T        | TAAR1        | missense_variant          | A        | T        | 1,46x10 <sup>-4</sup> |
| chr6         | 170713671       | G        | T        | FAM120B      | missense_variant          | R        | M        | 3,98x10 <sup>-6</sup> |
| chr7         | 4947145         | A        | C        | MMD2         | missense_variant          | I        | S        | NP                    |
| chr7         | 138732453       | T        | C        | ZC3HAV1      | missense_variant          | S        | G        | 3,98x10 <sup>-6</sup> |
| chr9         | 95048101        | T        | C        | IARS         | missense_variant          | Y        | C        | 3,98x10 <sup>-6</sup> |
| chr9         | 113563101       | G        | A        | MUSK         | missense_variant          | V        | M        | 2,42x10 <sup>-5</sup> |
| chr9         | 131193497       | C        | G        | CERCAM       | missense_variant          | P        | R        | 3,98x10 <sup>-6</sup> |
| chr9         | 139848372       | G        | A        | LCN12        | missense_variant          | R        | H        | 3,27x10 <sup>-5</sup> |
| chr10        | 98115022        | G        | T        | OPALIN       | missense_variant          | P        | Q        | NP                    |
| chr11        | 1471010         | C        | T        | BRSK2        | missense_variant          | R        | W        | 3,23x10 <sup>-5</sup> |
| chr15        | 40846173        | C        | G        | C15orf57     | missense_variant          | Q        | H        | 3,26x10 <sup>-5</sup> |
| <b>chr15</b> | <b>50891345</b> | <b>C</b> | <b>T</b> | <b>TRPM7</b> | <b>missense_variant</b>   | <b>G</b> | <b>D</b> | <b>NP</b>             |
| chr16        | 20360451        | C        | T        | UMOD         | missense_variant          | G        | S        | 1,59x10 <sup>-5</sup> |
| chr17        | 27896036        | G        | C        | TP53I13      | missense&splice_reg._var. | V        | L        | 2,53x10 <sup>-5</sup> |
| chr17        | 38133186        | G        | A        | GSDMA        | missense_variant          | G        | R        | 1,42x10 <sup>-5</sup> |
| chr17        | 41891721        | G        | A        | MPP3         | missense_variant          | R        | W        | 4,23x10 <sup>-6</sup> |
| chr17        | 72952028        | A        | T        | HID1         | missense_variant          | S        | T        | 1,19x10 <sup>-5</sup> |
| chr19        | 2422141         | C        | T        | TMPRSS9      | missense_variant          | T        | M        | 3,39x10 <sup>-5</sup> |
| chr19        | 16874700        | T        | G        | NWD1         | missense_variant          | L        | W        | NP                    |
| chr19        | 44039540        | T        | A        | ZNF575       | missense_variant          | Y        | N        | NP                    |
| chr20        | 31609529        | C        | T        | BPIFB2       | missense&splice_reg._var. | A        | V        | 1,13x10 <sup>-4</sup> |
| chr21        | 47817319        | T        | G        | PCNT         | missense_variant          | C        | G        | NP                    |
| chr21        | 47817321        | T        | G        | PCNT         | missense_variant          | C        | W        | NP                    |
| chrX         | 147022144       | C        | T        | FMR1         | missense_variant          | A        | V        | NP                    |
| chrX         | 153069484       | C        | T        | PDZD4        | missense_variant          | R        | H        | 4,46x10 <sup>-5</sup> |

Rare variants detected by whole exome sequencing in individual F2-II.1 after excluding variants in introns and UTRs, synonymous variants, variants in databases with frequency >1%, variants with quality <100 and variants with a low probability to be damaging (score <0,80 in

Polyphen). TRPM7 mutation indicated in bold. Chr: chromosome, Ref: reference, Var: variant, AA: amino acid, Mut: mutation, Freq: population frequency with respect to gnomAD (Karczewski et al 2020). NP: Not present.

**Supplementary Table 5.** Primers used for PCR and sequencing

| <b>Primer</b>           | <b>Sequence</b>                      |
|-------------------------|--------------------------------------|
| TRPM7-Fw                | 5' - CGCCGGAGCTGAGTTAGTTCTG – 3'     |
| TRPM7-RvA               | 5' - CTTTTTGCACCCTTCTAGCCCTC – 3'    |
| TRPM7-RvB               | 5' - CACATTCCTCTTGGTCAAAGTGC – 3'    |
| TRPM7-GSP1              | 5' – TTTAAGCAGAAGTTGC – 3'           |
| TRPM7-GSP2              | 5' – AGAATGACTTCAGGTTTGGTGTC – 3'    |
| TRPM7-GSP amplification | 5' – ATATGATAGCCTCACATACTTAGC – 3'   |
| TRPM7-G1046Df           | 5' - TGTAGATAAAGATGCCCATGACTTGC - 3' |
| TRPM7-G1046Dr           | 5' - TGTTTCTTCTGGAGTTCACTAACGCC - 3' |

**Supplementary Figure 1.** Overview of the defective spliced transcript of TRPM7

Sanger sequencing of the alternatively spliced TRPM7 containing regions of intron 1 and resulting in a preliminary stop codon.
